# Supplementary material for: Engineering of Saposin C Protein Chimeras for Enhanced Cytotoxicity and Optimized Liposome Binding Capability
Source: MDPI journal article supplement (doi:10.3390/pharmaceutics13040583), 2021-04-19
Supplement: s1 [file s1]

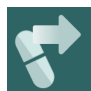

# Supplementary Materials: Engineering of Saposin C Protein Chimeras for Enhanced Cytotoxicity and Optimized Liposome Binding Capability

Suzanne I. Sandin, David M. Gravano, Christopher J. Randolph, Meenakshi Sharma and Eva de Alba

**Citation:** Sandin, S.I.; Gravano, D.M.; Randolph, C.J.; Sharma, M.; de Alba, E. Engineering of Saposin C Protein Chimeras for Enhanced Cytotoxicity and Optimized Liposome Binding Capability. *Pharmaceutics* **2021**, *13*, 583. <https://doi.org/10.3390/pharmaceutics13040583>

Academic Editor:  
Anna Angela Barba

Received: 4 March 2021  
Accepted: 14 April 2021  
Published: 19 April 2021

**Publisher's Note:** MDPI stays neutral with regard to jurisdictional claims in published maps and institutional affiliations.

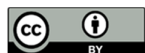

**Copyright:** © 2021 by the authors. Licensee MDPI, Basel, Switzerland. This article is an open access article distributed under the terms and conditions of the Creative Commons Attribution (CC BY) license (<http://creativecommons.org/licenses/by/4.0/>).

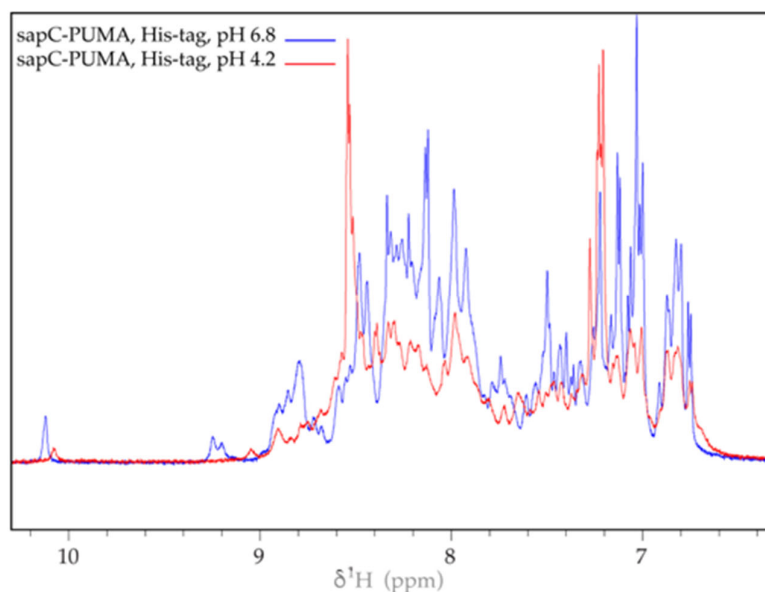

**Figure S1.** SapC-PUMA with His-tag aggregates upon acidification: SapC-PUMA with His-tag at pH 6.8 (blue, overall intensity from integration set to 100%) and pH 4.2 (red, intensity of 77% compared to the spectrum at pH 6.8).

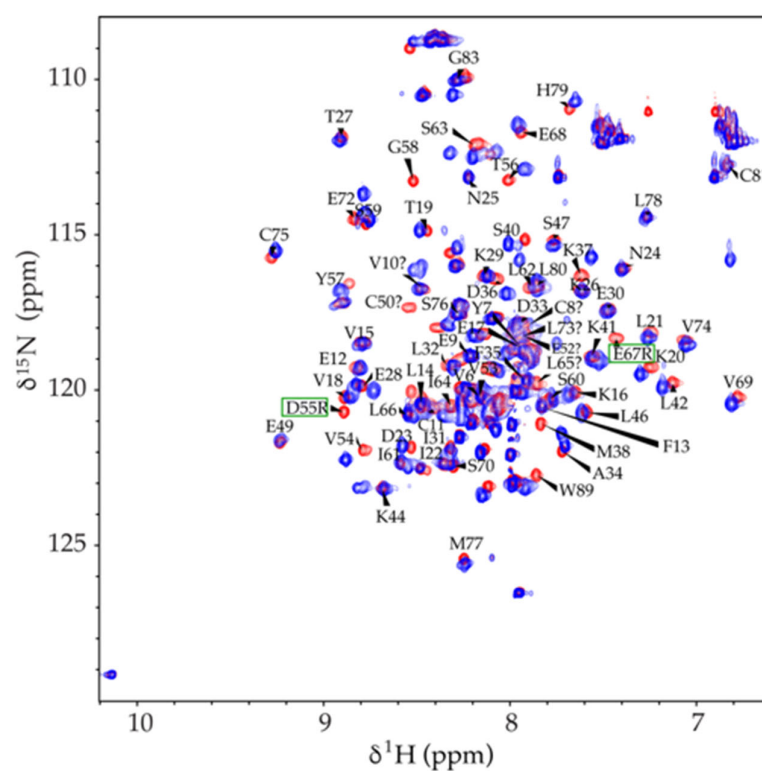

**Figure S2.** Double-mutant sapC-PUMA-DM shares structure identity to sapC-PUMA:  $[\text{H},^{15}\text{N}]$ -sofast HMQC of sapC-PUMA (blue) and sapC-PUMA-DM (red) at pH 6.8 The amino acids that are mutated are shown with green rectangles. Other assignments are shown with the corresponding labels.

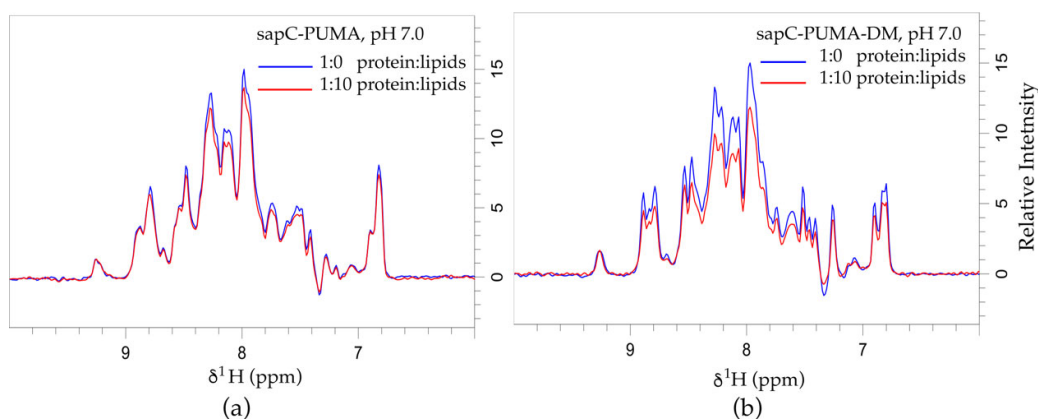

**Figure S3.** Increased binding of sapC-PUMA-DM to liposomes: 1D projections of  $[^1\text{H}, ^{15}\text{N}]$ -sofast HMQC of sapC-PUMA (a) and sapC-PUMA-DM (b) in the absence (blue) and presence (red) of lipids at 1:10 protein:lipid molar ratio, pH 7. The binding of sapC-PUMA-DM is significantly larger compared to the wild-type chimera (8.5% vs. 28%) according to the decrease in signal intensity resulting from liposome binding.

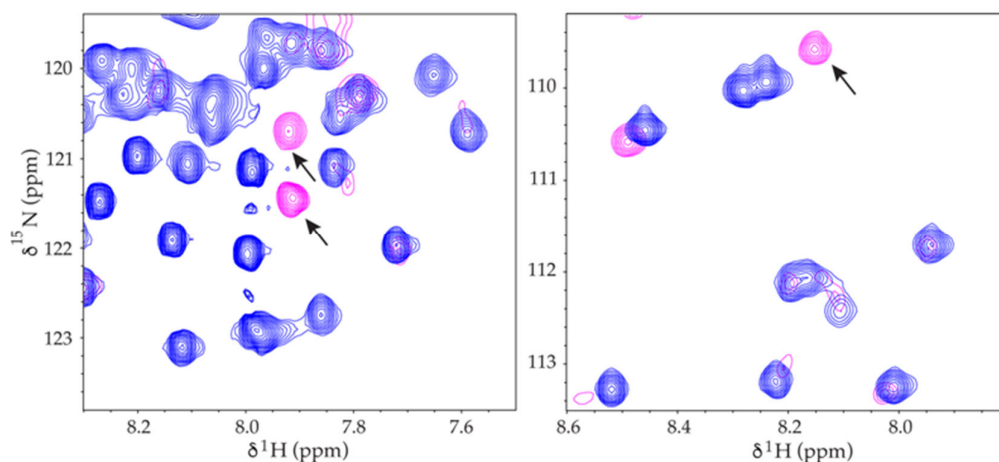

**Figure S4.** The PUMA region in sapC-PUMA-DM also binds Bcl-xL with high affinity: Selected regions of  $[^1\text{H}, ^{15}\text{N}]$ -sofast HMQC spectra of sapC-PUMA-DM in the absence (blue) and in the presence (magenta) of 1:1 molar ratio of unlabeled Bcl-xL. The regions shown are equivalent to those appearing in Figure 8 c,d.

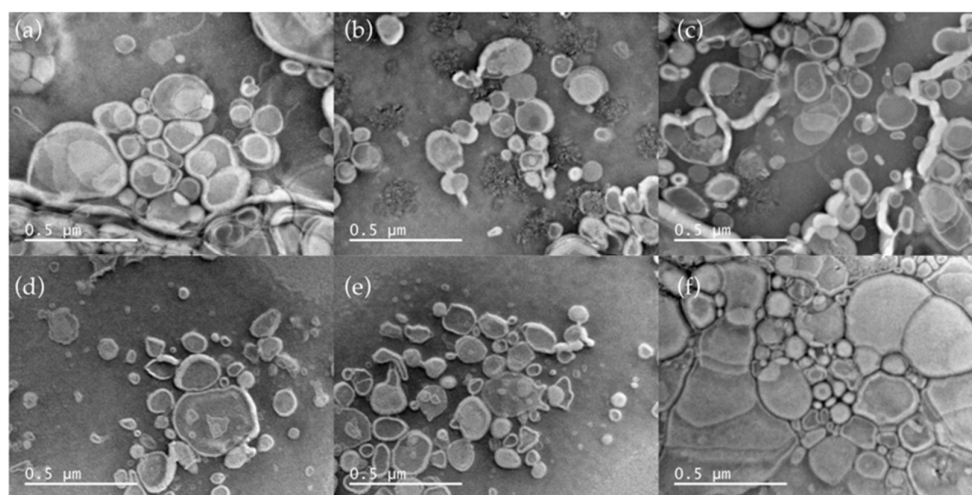

**Figure S5.** Liposome shape and size distortion in negative stained samples for TEM analysis: Micrographs (a)–(c) (same liposome sample) and (f) (different liposome sample but identical preparation procedure as (a)–(c)) were acquired after allowing the liposome solution to dry before staining. Micrographs (d,e) (same liposome samples as (f)) were allowed to dry for 20 min.
